# Hydrogel-coating improves the in-vivo stability of electrochemical aptamer-based biosensors

Shaoguang Li,<sup>a†</sup> Jun Dai,<sup>b†</sup> Man Zhu,<sup>a</sup> Netzahualcóyotl Arroyo-Currás,<sup>c,d</sup> Hongxing Li,<sup>a</sup> Yuanyuan Wang,<sup>a</sup> Quan Wang,<sup>a</sup> Xiaoding Lou,<sup>\*a</sup> Tod E. Kippin,<sup>d,e,f</sup> Shixuan Wang,<sup>b</sup> Kevin W. Plaxco,<sup>\*g,h,i</sup> Hui Li,<sup>\*a</sup> and Fan Xia<sup>\*a</sup>

<sup>a</sup>Engineering Research Center of Nano-Geomaterials of Ministry of Education, Faculty of Materials Science and Chemistry, China University of Geosciences, Wuhan 430074, China

<sup>b</sup>Department of Obstetrics and Gynecology, Tongji Hospital, Tongji Medical College, Huazhong University of Science and Technology, Wuhan 430074, China

<sup>c</sup>Department of Pharmacology and Molecular Sciences, Johns Hopkins University School of Medicine, Baltimore, Maryland 21205, United States

<sup>d</sup>Department of Chemical and Biomolecular Engineering, Whiting School of Engineering, Johns Hopkins University, Baltimore, Maryland 21218, United States

<sup>e</sup>Department of Psychological and Brain Sciences, University of California, Santa Barbara, CA 93106;

<sup>f</sup>The Neuroscience Research Institute, University of California, Santa Barbara, CA 93106;

<sup>g</sup>Department of Molecular Cellular and Developmental Biology, University of California, Santa Barbara, CA 93106

<sup>h</sup>Department of Chemistry and Biochemistry, University of California, Santa Barbara, CA 93106;

<sup>i</sup>Center for Bioengineering, University of California, Santa Barbara, CA 93106;

<sup>j</sup>Interdepartmental Program in Biomolecular Science and Engineering, University of California, Santa Barbara, CA 93106;

<sup>†</sup>These authors contributed equally to this work.

34 **Abstract**

35

36 The ability to track the levels of specific molecules, such as drugs, metabolites, and biomarkers,  
37 in the living body, in real time and for long durations would improve our understanding of health  
38 and our ability to diagnose, treat and monitor disease. To this end, we are developing  
39 electrochemical aptamer-based (E-AB) biosensors, a general platform supporting high-frequency,  
40 real-time molecular measurements in the living body. Here we report that the addition of an  
41 agarose hydrogel protective layer to E-AB sensors significantly improves their baseline stability  
42 when deployed in the complex, highly time-varying environments found in vivo. The improved  
43 stability is sufficient that these hydrogel-protected sensors achieved good baseline stability when  
44 deployed in situ in the veins, muscles, bladder, or tumors of living rats without the use of the drift  
45 correction approaches traditionally required in such placements. Finally, this improved stability is  
46 achieved without any significant, associated “costs” in terms of detection limits, response times,  
47 or biocompatibility.

48

49

## 50 **Introduction**

51

52 The ability to track the levels of specific molecules, such as drugs, metabolites, or biomarkers  
53 continuously and in real time in the living body would vastly improve our knowledge of  
54 physiology, pharmacokinetics, and toxicology and would pave the way for truly high-precision  
55 personalized medicine. Such a technology, for example, would improve our understanding of  
56 many time-dependent physiological events, including the distribution phases of therapeutic drugs,  
57 the pulsatile release of hormones, and the hemostatic control of key metabolites.<sup>[1-3]</sup> In the clinic  
58 such a technology could likewise provide the high-precision, patient-specific pharmacokinetics  
59 required to provide high precision dosing, and even support real-time, feedback-controlled drug  
60 delivery of unprecedented accuracy.<sup>[4-5]</sup> The development of such a technology, however, faces  
61 significant hurdles.<sup>[6-7]</sup> Specifically, such a technology must: (1) achieve clinically-relevant  
62 sensitivity and specificity; (2) must be reversible, so that it can follow rising and falling  
63 concentrations; (3) it must operate continuously, or at least at a frequency that is high relative to  
64 physiological timescales (it thus cannot rely on batch processing, such as separations or the  
65 addition of exogenous reagents); and (4) it must remain stable in the complex, fluctuating  
66 environments found within the body. Faced with these hurdles, continuous, in-vivo sensing had,  
67 until recently only been reported for a short list of metabolites, physiological molecules (e.g.,  
68 glucose,<sup>[8]</sup> lactate,<sup>[9]</sup> and blood oxygen<sup>[10]</sup>) and neurotransmitters (e.g., dopamine,  
69 acetylcholine).<sup>[11-12]</sup> Moreover, the sensors for each of these targets are critically reliant on the  
70 chemical or enzymatic reactivity of their targets, and thus they are not generalizable to the  
71 detection of other, arbitrary targets.

72 Against this background, we<sup>[6, 12-14]</sup>, followed by others<sup>[15-17]</sup>, have developed electrochemical  
73 aptamer-based (E-AB) biosensors, the first platform technology supporting high-frequency, in-  
74 vivo molecular measurement that does not rely on the intrinsic chemical or enzymatic reactivity  
75 of its targets. To achieve this, E-AB sensors employ a target binding-induced conformational  
76 change to generate an electrochemical signal (**Fig. 1a**). Specifically, E-AB sensors are comprised  
77 of redox-reporter-modified DNA or RNA aptamer, a class of functional oligonucleotides that binds  
78 a specific analyte and can be artificially selected via high-throughput, in-vitro methodologies, that  
79 are covalently attached to an interrogating electrode. The binding of an analyte to these recognition  
80 elements alters the efficiency with which the redox reporters transfers electrons to or from the

81 electrode, producing an easily measurable signal change when the sensor is interrogated  
82 electrochemically.<sup>[12]</sup> Because this signaling mechanism recapitulates the conformation-linked  
83 signaling typically employed by naturally occurring chemo-perception systems, E-AB sensors are  
84 selective enough to deploy directly in complex sample matrices.<sup>[18-19]</sup>

85 While E-AB sensors are reasonably stable in blood and serum *in vitro*, they exhibit significant  
86 drift when deployed directly in the living body<sup>[20-22]</sup>, which presumably arises due to degradation  
87 of the target-recognizing aptamer and the non-specific adsorption of cells and other blood  
88 components to the sensor surface. To circumvent this, we have historically employed drift  
89 correction methods, such as kinetic differential measurements (KDM)<sup>[23]</sup>, dual-reporter  
90 approach<sup>[12]</sup> or chronoamperometry.<sup>[24]</sup> The former two employ a secondary signal from the  
91 sensor to correct for the drift, while the latter monitors the electron transfer time constant to  
92 quantify the target, an observation that is independent of the number of aptamer probes and thus  
93 rather insensitive to sensor degradation. Using these approaches, we have achieved good  
94 measurement accuracy and returns to baseline for *in-vivo* runs up to several hours. Ultimately,  
95 however, these approaches fail when the sensor degradation becomes so great that its signal-to-  
96 noise ratios become unacceptably low. Thus motivated, here we explore a complementary  
97 technology: the use of a hydrogel matrix to protect E-AB sensors from non-specific adsorptions  
98 and sensor degradations by decreasing the access of high molecular weight, biological components  
99 (e.g., proteins, blood cells) to the sensor surface (**Fig. 1b**), reducing their ability to degrade sensor  
100 performance.

101

102

103

104

105

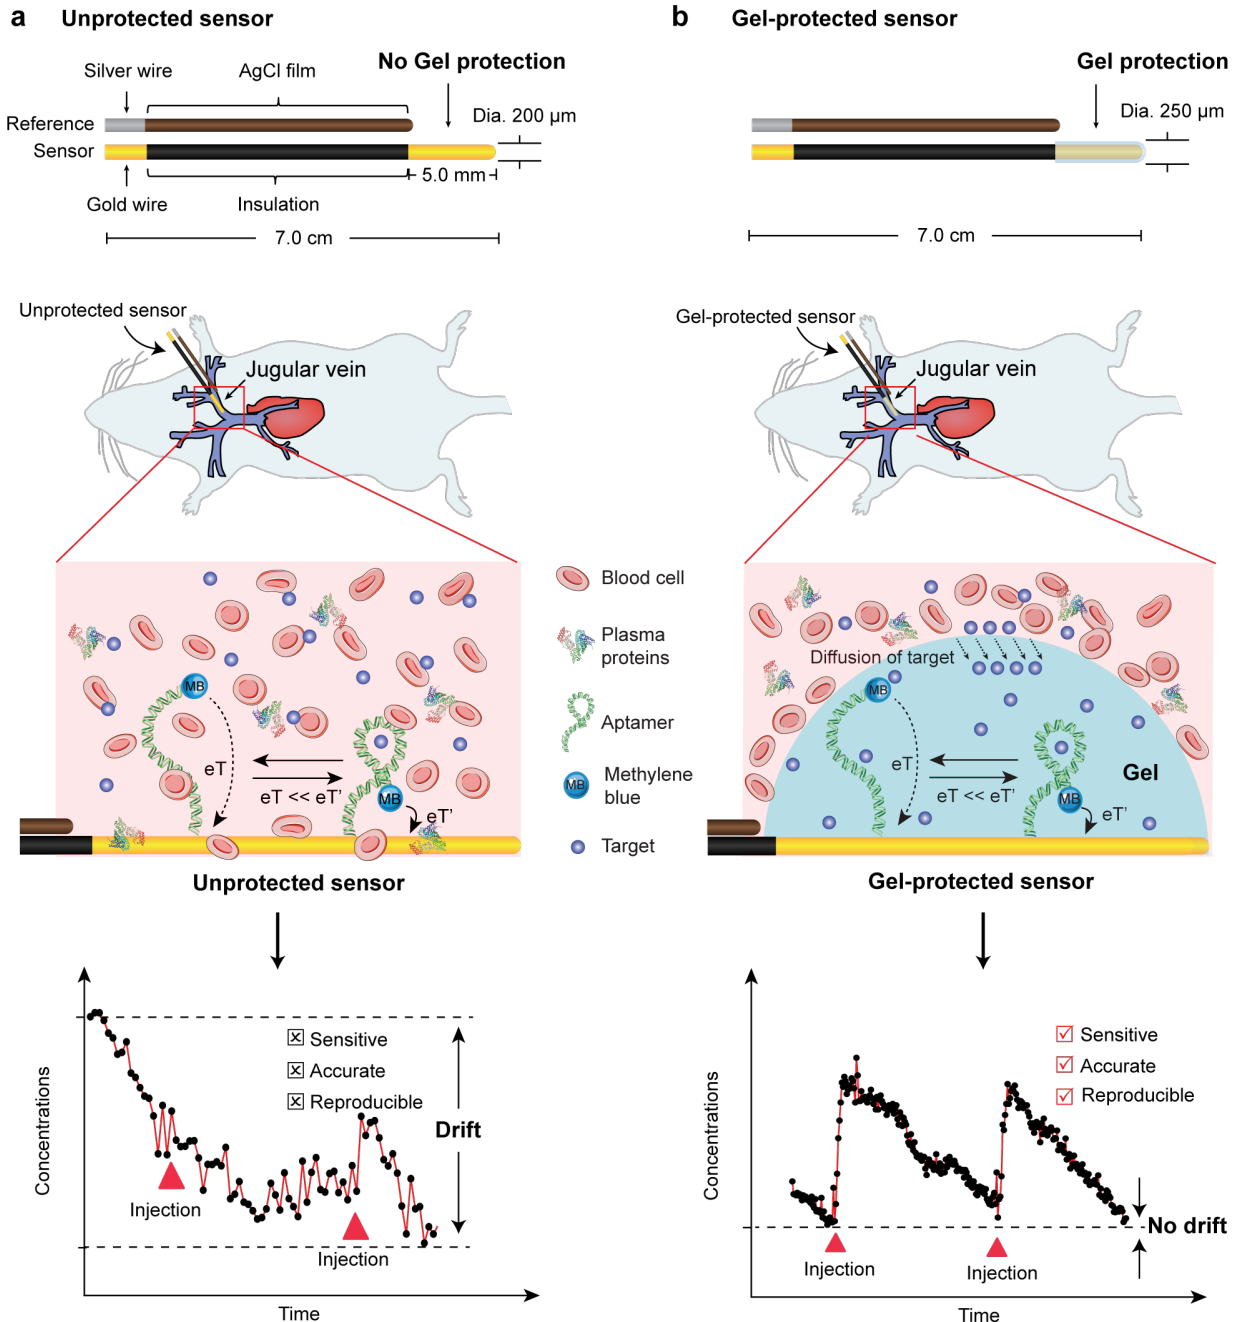

106

107 **Fig. 1** Here we have demonstrated the ability of a protective hydrogel coating layer to improve the baseline  
 108 stability of electrochemical aptamer-based (E-AB) biosensors when they are deployed in situ in the living  
 109 body. The signaling mechanism of E-AB sensors, which recapitulates the conformation-linked signaling  
 110 employed by naturally occurring chemo-perception systems, renders them selective enough to be deployed  
 111 in complex matrix, such as blood serum.<sup>[18-19]</sup> (a) However, they suffer from significant signaling baseline  
 112 drift when they are deployed directly in whole blood for continuous, real-time measurements both in vitro  
 113 and in vivo without any drift corrections (bottom panels shown are real data collected in vivo). Historically

114 we have corrected this drift using algorithms such as kinetic differential measurements or  
115 chronoamperometry.<sup>[23-24]</sup> (b) Here, in contrast, we demonstrate the good baseline stability of uncorrected,  
116 gel-protected sensors (bottom panels shown are real data collected in vivo).

117

118

## 119 **Results**

120

### 121 **Gel-coating improves E-AB sensor performance**

122 The utility of gel coating to solve the baseline drift of E-AB sensors relies on the differential  
123 kinetics of molecular diffusion through a dense hydrogel. To characterize this diffusion, we first  
124 used both modeling and experimental approaches to estimate the size-dependence of molecular  
125 diffusion kinetics through a representative hydrogel. Specifically, using Amsden's theoretical  
126 model,<sup>[25]</sup> we found that the time required for diffusion through a certain length of hydrogel is  
127 greatly dependent on both molecular size (here, we employed a variety of proteins in whole blood)  
128 and gel porosity (i.e., gel wt% concentrations, **Fig. 2a** and **2b**, Supplementary Fig. 1). Consistent  
129 with this, when we incubated a 5 mg/mL solution of fibrinogen (~25 nm in diameter) and 5 mg/mL  
130 solution of BSA (~3 nm in diameter) on top of a gel for 24 h and monitored the two proteins'  
131 diffusion into the gel mass, we found that, at a depth of ~25  $\mu\text{m}$  (the thickness of the gel on our  
132 protected sensors), the concentration of the former only reached 10% of the applied concentration  
133 (**Fig. 2c** and **2d**). In contrast, the latter, lower-molecular weight protein was homogeneously  
134 distributed throughout the entire ~ 400  $\mu\text{m}$  thickness of the gel slice.<sup>[26-27]</sup> Not surprisingly, the  
135 presence of a hydrogel also prevents the agglomeration of blood cells onto a sensor surface (**Fig.**  
136 **2e**), as these are far too large to penetrate the gel network.

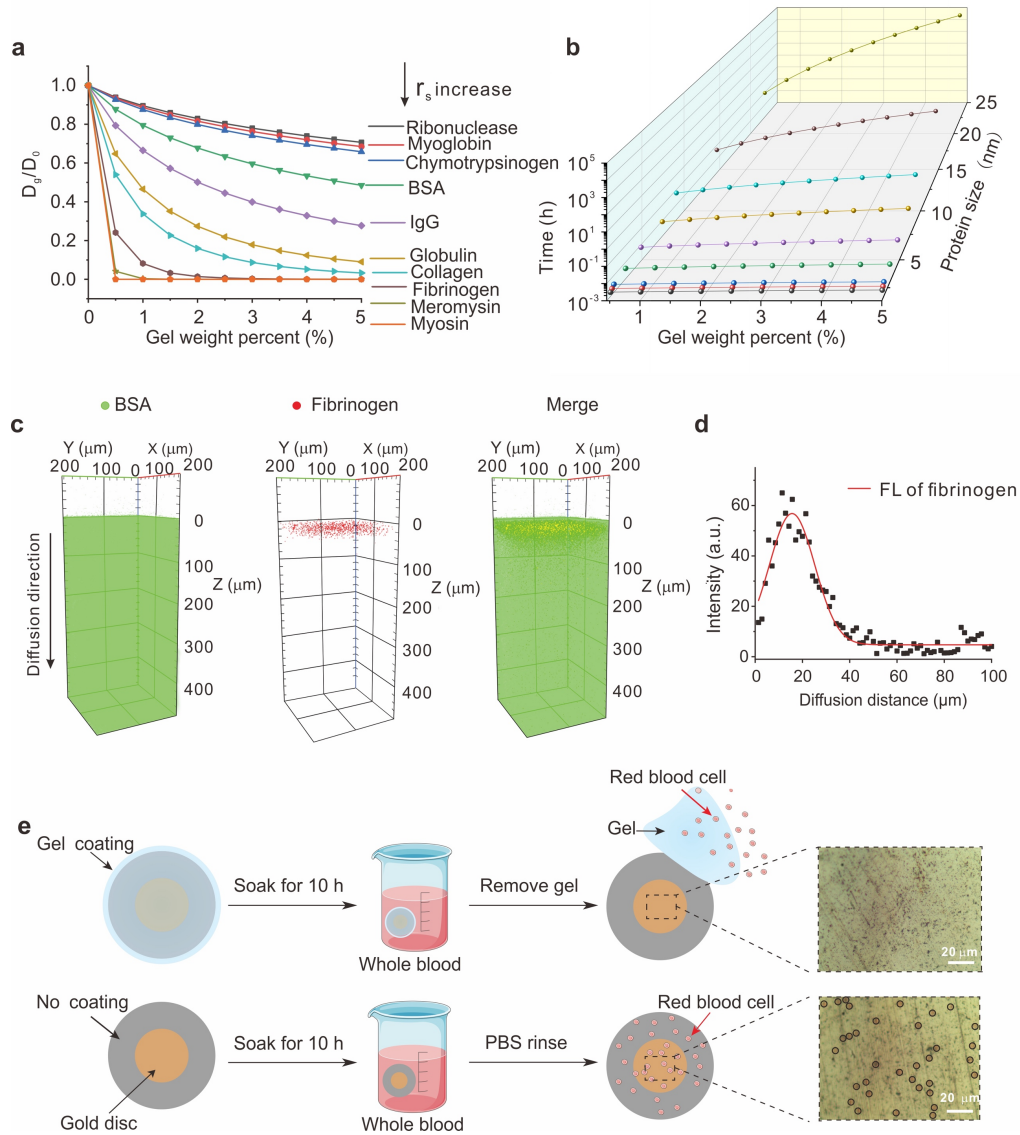

137  
138

139 **Fig. 2** Hydrogel greatly reduces the diffusion of high-molecular weight proteins and effectively eliminates  
 140 the diffusion of cells. (a) Using Amsden's theoretical model, we modeled the extent to which the presence  
 141 of a hydrogel reduces the diffusion constant of various proteins ( $D_g/D_0$  reflects the diffusion constant in the  
 142 gel relative to that seen in the free solution). As expected, the gel significantly reduces the diffusion of high-  
 143 molecular weight proteins, while have less of an effect on lower molecular weight proteins. (b) The time  
 144 duration required for blood components to diffuse through a specific depth (here,  $\sim 25 \mu\text{m}$ ) is likewise  
 145 greatly dependent on their molecular weight and the density of the gel. (c-d) Using confocal microscopy  
 146 we have monitored the diffusion of BSA ( $\sim 3 \text{ nm}$  in diameter) and fibrinogen ( $\sim 25 \text{ nm}$ ) through a gel slice  
 147 fabricated from 3 wt% gel solution over the course of 24 h. Under these circumstances the concentration of  
 148 fibrinogen at a depth of  $25 \mu\text{m}$  reaches only  $\sim 10\%$  of the applied concentration. In contrast, after the same  
 149 24 h incubation the concentration of BSA seen in the gel is homogeneously distributed across its entire 400

150  $\mu\text{m}$  thickness of the gel. (e) Not surprisingly, while red blood cells adhere to an unprotected electrode (i.e.,  
151 no gel coating) none are seen on a gel-protected electrode (The red blood cells on the unprotected sensors  
152 are outlined with black circles).

153

#### 154 **Baseline stability in-vitro**

155

156 Motivated by the ability of a hydrogel to greatly reduce the diffusion of blood cells and higher  
157 molecular weight proteins, we next investigated their ability to protect E-AB sensors in vitro in (a)  
158 undiluted whole blood and (b) excised, solid tissue, using a sensor against the antibiotic  
159 kanamycin<sup>[14]</sup> as our test bed. Using a standard dip-coating protocol (Supplementary Fig. 2), we  
160 first fabricated a gel-protected E-AB sensors and then interrogated these sensors in vitro both in  
161 buffer and whole blood using a three-electrode system (Fig. 3a). As expected, we observed similar  
162 stability when we challenge unprotected and gel-protected versions of this sensor in phosphate  
163 buffered saline (Supplementary Fig. 3). In contrast, when the two are challenged in vitro in  
164 undiluted whole blood, the performance of the gel-protected sensor is notably improved over that  
165 of unprotected sensors. For example, over 10 h the peak currents of unprotected sensors fall by  
166 70% in undiluted whole blood and over 10 h under these conditions, those of gel-protected sensors  
167 fall by less than 5% (**Fig. 3b, c, d**). Perhaps not coincidentally, after interrogating for 10 h in whole  
168 blood, we observed that, while unprotected sensor was covered with biocomponents, gel-protected  
169 sensor exhibited no adsorptions to such components (Supplementary Fig. 4). The improved  
170 stability of gel-protected sensors likewise holds for sensors inserted into excised solid tissue (Fig.  
171 3e) and for sensors employing aptamers against other than kanamycin (Supplementary Fig. 5).

172 To determine which blood components contribute most significantly to the observed drift we  
173 next challenged gel-protected and unprotected sensors for 10 h in either plasma, which is the liquid  
174 fraction of whole blood (**Fig. 3f**), or formed elements (Supplementary Fig. 6), which is the cellular  
175 fraction. When incubated for 10 h, gel-protected sensors exhibited excellent stability under both  
176 conditions. In contrast, unprotected sensors lost 80% of their signal in formed elements and 20%  
177 in plasma, suggesting that the agglomeration of blood's cellular components on the sensor or the  
178 reaction of their components with the DNA aptamer (e.g., DNAses liberated from ruptured cells,  
179 **Fig. 3g**) are a larger source of baseline drift than that associated with the proteins in plasma.



180 The drift protection provided by the gel coating comes at relatively little cost in sensor  
181 equilibration time, detection limits. For example, while the presence of the protecting gel slows  
182 sensor response times, this effect is small relative to the timescales of the physiological processes  
183 E-AB sensors have been used to investigate. Specifically, a kanamycin-detecting, gel-protected  
184 sensor reaches 90% of its maximum signal change within less than one minute (**Fig. 3h**), a  
185 timescale far faster than the tens of minutes elimination rate of this drug.<sup>[14]</sup> The detection limit of  
186 a gel-protected sensor is likewise effectively indistinguishable from that of the equivalent,  
187 unprotected sensor (**Fig. 3i**). Consistent with this, the electron transfer kinetics of gel-protected  
188 sensors are closely comparable to those observed for unprotected sensors (Supplementary Fig. 7),  
189 suggesting their gain and detection limits should be similar.

190

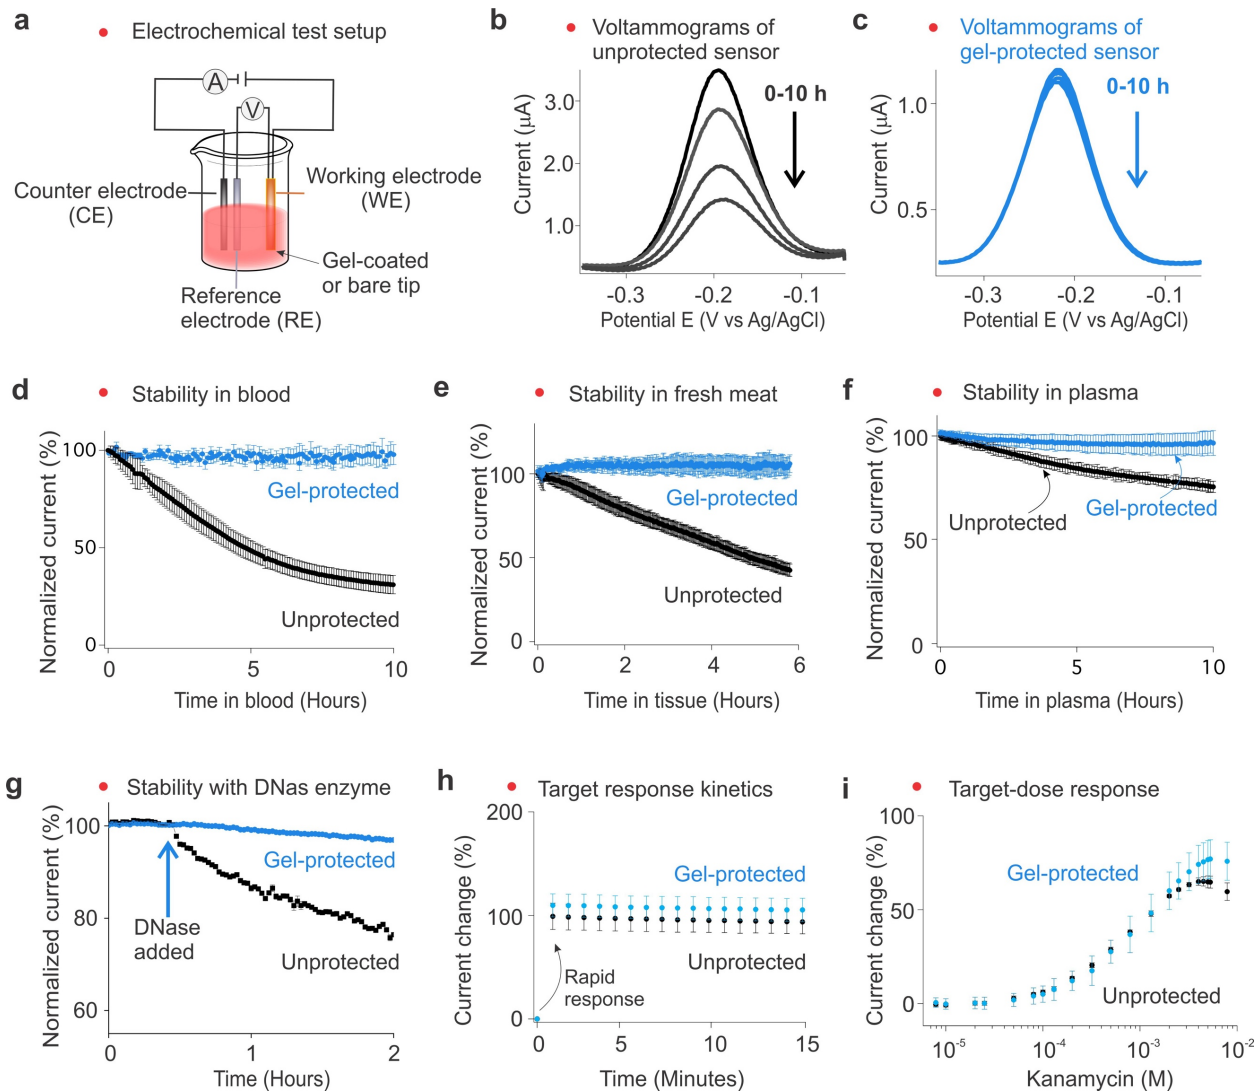

191

192 **Fig. 3** Gel-protected sensors achieve excellent stability while maintaining rapid response time and low  
193 limits of detection. (a) Here we employed a three-electrode system to interrogate our sensor, including a  
194 gold working electrode that serves as the sensor, a Ag/AgCl reference electrode, and a platinum counter  
195 electrode. The gold working electrode was used as is or protected by gel layer, i.e., unprotected or gel-  
196 protected sensors. (b) When deployed in whole blood, unprotected sensors exhibited a significant signal  
197 loss shown as the current obtained via square wave voltammetry decaying dramatically. (c) Under the same  
198 conditions, the signal obtained from gel-protected sensors is quite stable. (d) For example, while  
199 unprotected sensors exhibit 80% signal loss over 10 h in whole blood, gel-protected sensors exhibit no  
200 signal loss under the same conditions. After interrogating for 10 h in whole blood, while unprotected sensor  
201 was fully covered with biocomponents, gel-protected sensor exhibited no adsorptions to these components  
202 (Supplementary Fig. 4). Gel-protected sensors likewise remain far more stable (e) when inserted into a  
203 tissue sample (here fresh pork) and (f) in plasma. (g) When deployed in PBS buffer in the presence of a 5  
204 mM solution of DNases-I, unprotected sensors exhibit 20% signal loss over 1.5 h, while for gel-protected  
205 sensors the loss is less than 5%. The (h) response time and (i) limits of detection of gel-protected sensors  
206 remain quite similar to those of unprotected sensors.

207

208

### 209 **Continuous, real-time, in vivo molecular measurements**

210

211 Motivated by the improved stability of gel-protected sensors exhibit in vitro, we next tested them  
212 in a variety of in vivo scenarios. As the first of these tests we emplaced a kanamycin-detecting  
213 sensor in the external jugular veins of an anesthetized Sprague-Dawley rats, and injected the drug  
214 into the opposite external jugular vein. Under these conditions, an unprotected (non-drift-corrected)  
215 sensor exhibits ~40% loss in signal over the course of 2 h (**Fig. 4a and 4b**). Gel protection reduced  
216 this loss to less than 5% over the same period. Following two sequential intravenous boluses of  
217 kanamycin, the gel-protected sensor recorded consecutive concentration spikes corresponding to  
218 each bolus, with maximum kanamycin concentrations ( $C_{\max}$ ) of ~200  $\mu\text{M}$  and the effective  
219 clearance of 90% of the drug from the circulatory system within 50 min (**Fig. 4c**), values that are  
220 fully consistent with prior studies of the pharmacokinetics of this drug.<sup>[6]</sup> Repeating these  
221 measurements with the gel-protected sensor in multiple rats we observed reproducibility consistent  
222 with the known pharmacokinetic variability of the aminoglycosides<sup>[28]</sup> (Supplementary Fig. 8-9).  
223 Finally, we used gel-protected sensors to follow monotonically increasing intravenous kanamycin

224 doses spanning the 10-30 mg/kg therapeutic ranges used in humans<sup>[29]</sup> (**Fig. 4d**). The sensor  
225 responded rapidly to each injection, and measured peak drug concentrations in good accordance  
226 with the relevant delivered dose (**Fig. 4e**).

227 Gel-protected sensors achieve clinically relevant accuracy in vivo without employing the drift  
228 correction mechanism we have previously employed. To see this, we performed simultaneous in-  
229 vivo and ex-vivo measurements using, respectively, a gel-protected E-AB sensor and blood draws  
230 followed by high-performance liquid chromatography (**Fig. 5**). Specifically, we implanted one  
231 kanamycin-detecting, gel-protected sensor in the jugular vein of a living rat and performed the  
232 real-time, continuous E-AB measurements while drawing blood samples at 20 to 30 min intervals  
233 from the opposite jugular vein. Performing HPLC-ELSD measurements immediately after in-vivo  
234 test (to maintain the freshness of the sample) using a standard protocol for blood pre-treatment  
235 (detailed protocols see supplementary materials, Supplementary Figs. 10-11), the ex-vivo  
236 measured concentrations for each sample were in close accordance to the values obtained from E-  
237 AB sensors (**Fig. 5b, c**). For example, measurements taken by the two approaches during the  
238 elimination phase of the drug's pharmacokinetics were within 30% of one another, a level of  
239 accuracy similar to that of commercial glucose sensors.<sup>[30-31]</sup>

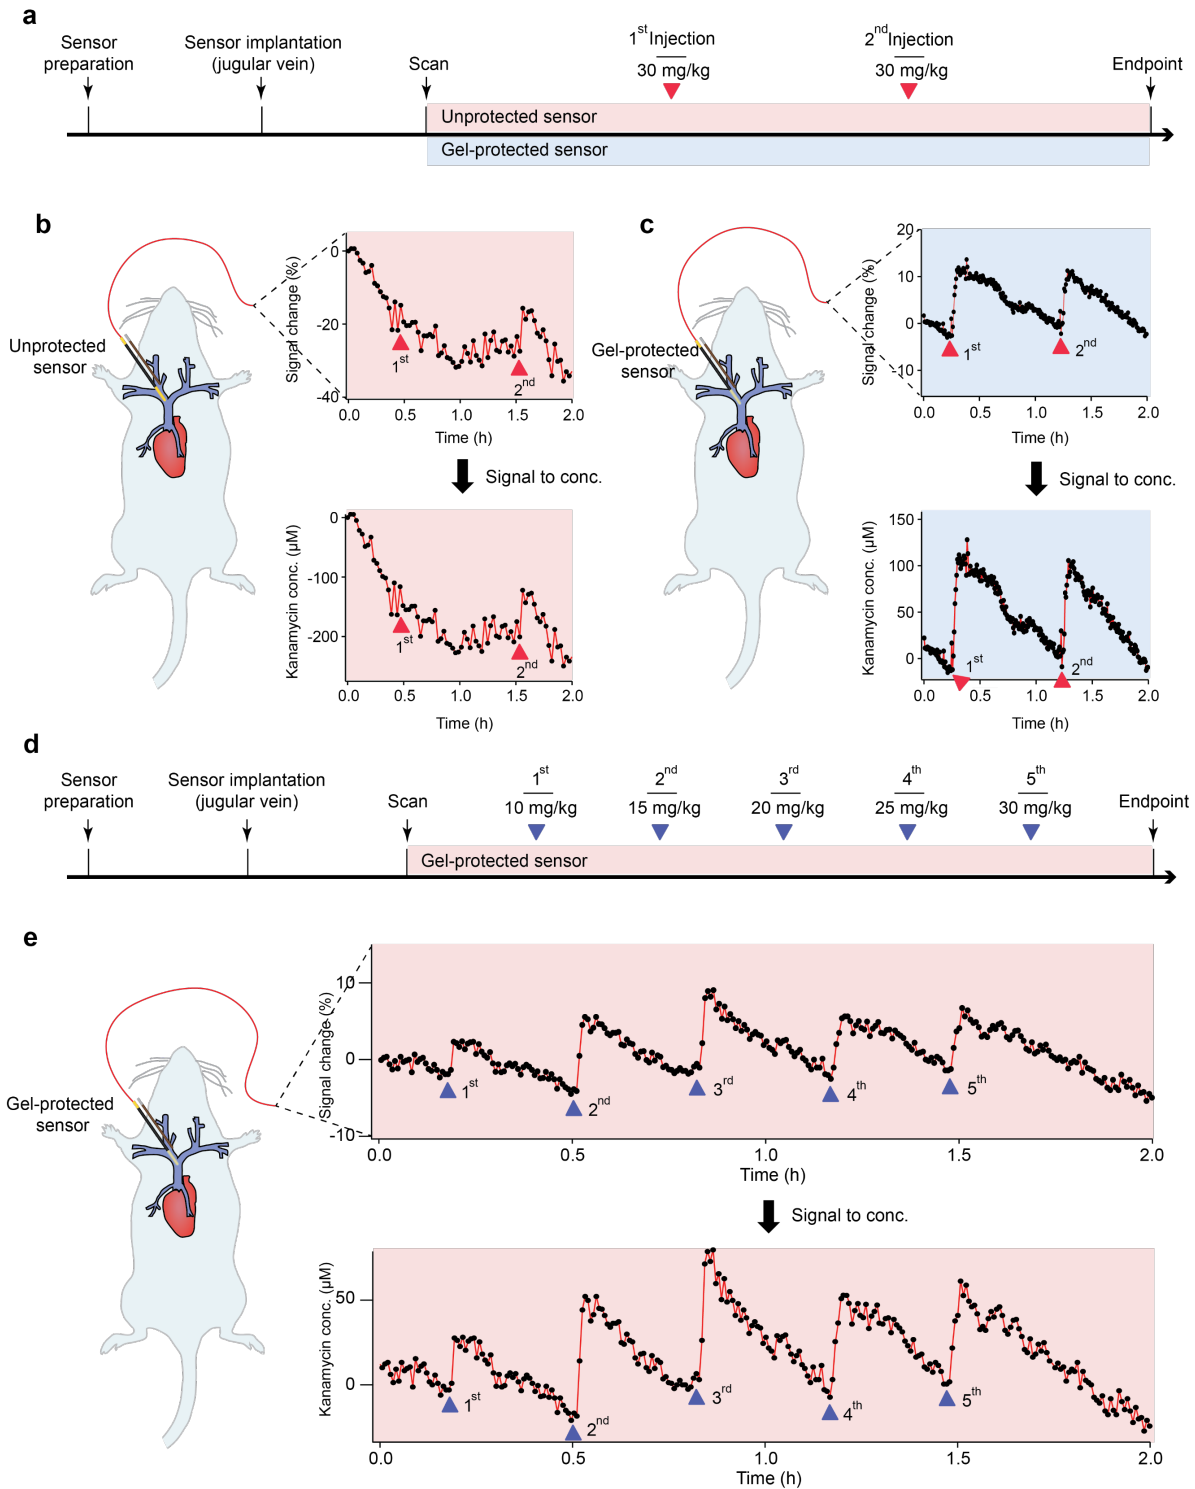

240

241

242 **Fig. 4** Gel-protected E-AB sensors support continuous, real-time molecular measurements in situ in the  
243 living body without the use of the drift-correction algorithms previously used in such deployments.<sup>[23]</sup> (a)

244 To show this, we first emplaced kanamycin-detecting sensors in the external jugular veins of anesthetized

245 Sprague-Dawley rats, which we then challenged via intravenous injection of the drug into the opposite  
246 external jugular vein. (b) Unprotected sensors exhibited significant drift over the course of these few-hour  
247 experiments, rendering them incapable of determining the target concentrations without employing drift-  
248 correction methods. (c) In contrast, gel-protected sensors are much more stable, achieving precise,  
249 continuous molecular measurement. (d) We then followed monotonically increasing intravenous doses of  
250 kanamycin spanning the 10-30 mg/kg therapeutic ranges used in humans. (e) The sensor responded rapidly  
251 to each injection, measuring maximum concentrations between 34 and 100  $\mu\text{M}$  in good accordance with  
252 the delivered dose.

253

254

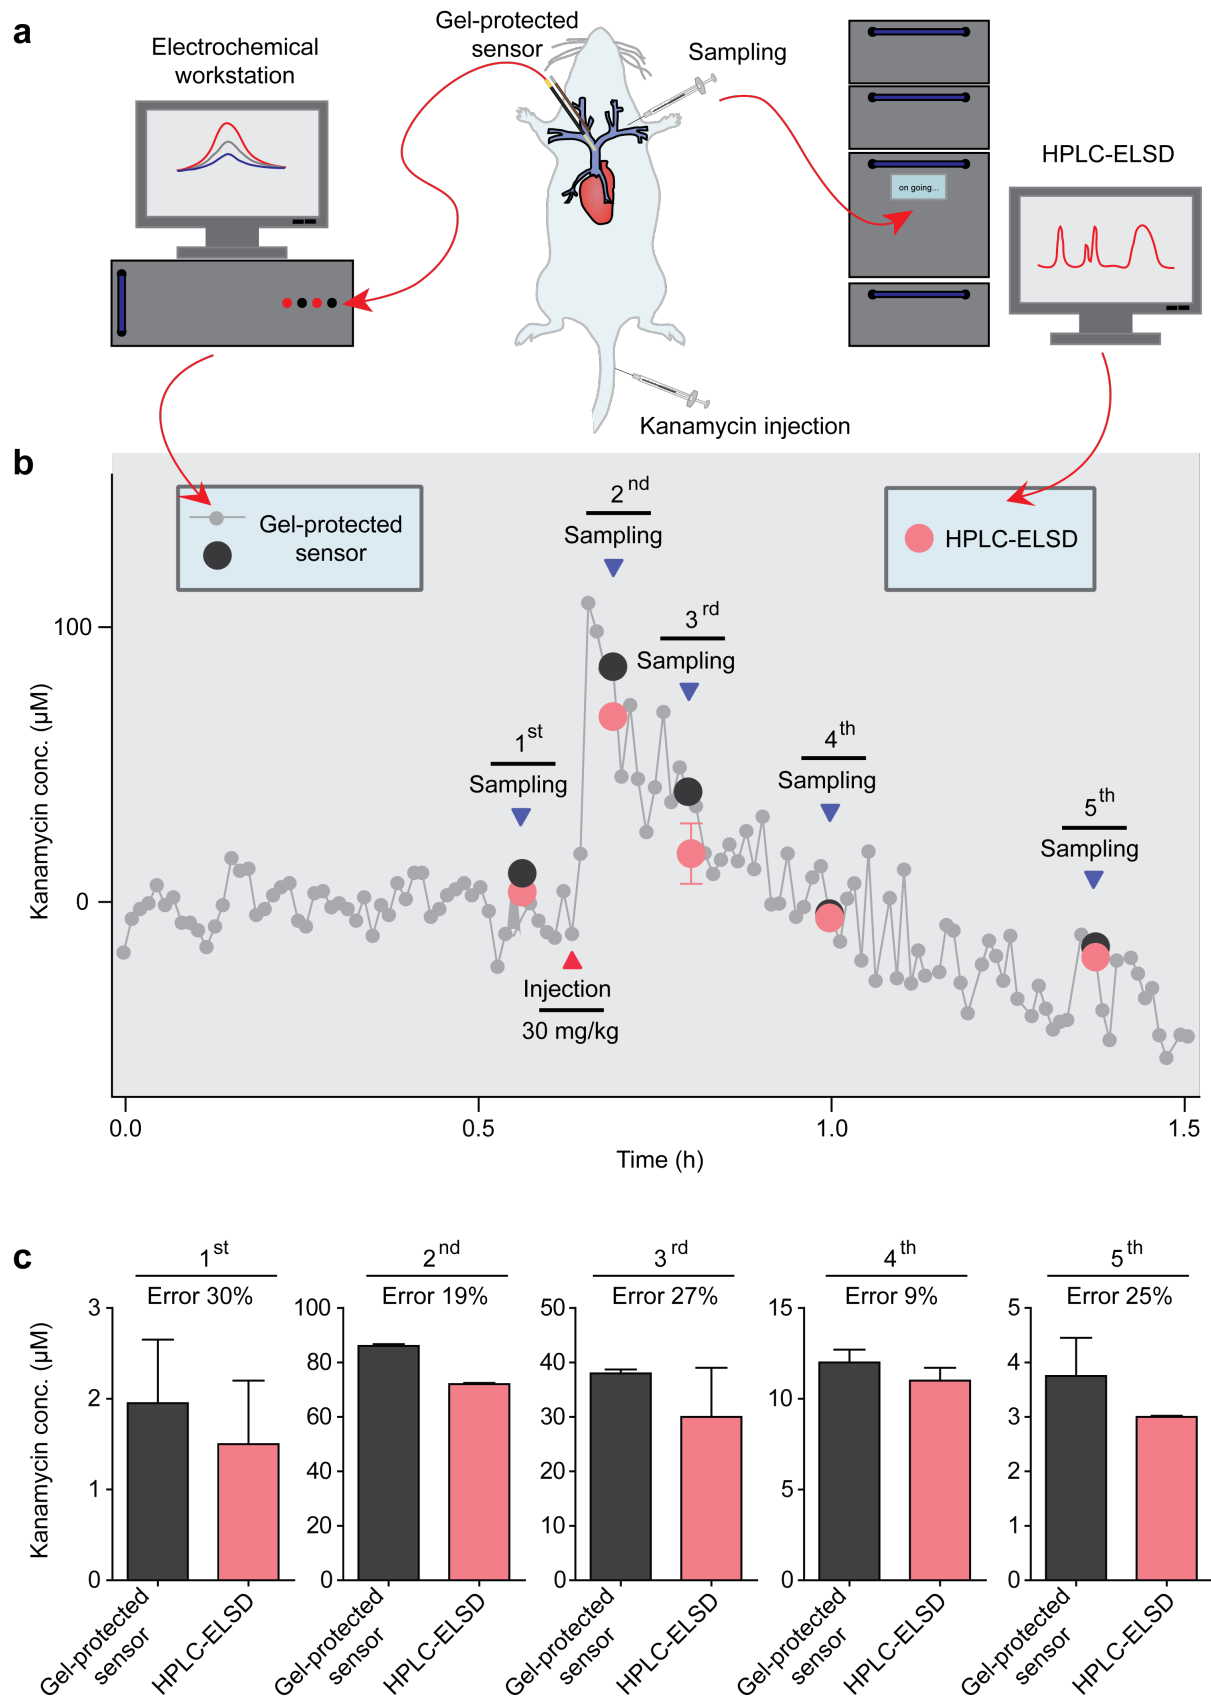

256 **Fig. 5** Gel-protected E-AB sensors achieved clinically relevant accuracy without employing drift-correction  
257 approaches.<sup>[23-24]</sup> (a) and (b) To see this, we performed parallel pharmacokinetics studies using ex-vivo  
258 analysis via high-performance liquid chromatography as our gold standard. Specifically, used a gel-  
259 protected E-AB sensor in the jugular vein of a live rat to perform real-time measurements of kanamycin,  
260 while simultaneously collecting blood samples at an interval of 20 to 30 minutes for subsequent bench-top  
261 analysis. (c) The results of the two approaches are in good accordance throughout the experiment. The  
262 precision of E-AB sensors as defined by the standard deviation observed during the pre-challenge baseline  
263 is on the order of  $\sim 30$   $\mu\text{M}$ . The error bars on the E-AB data are derived from the error in the calibration  
264 curves obtained via in-vitro titrations. The error bars on HPLC data were derived from replicate  
265 measurements performed on each sample. In both cases the error bars reflect 95% confidence intervals.

266  
267

### 268 **Simultaneous, multi-compartment measurements**

269

270 Gel-protected E-AB sensors also achieve good baseline stability when placed in other bodily  
271 compartments, suggesting that they can be used, for example, to monitor time-varying molecular  
272 concentrations throughout the body.<sup>[32-33]</sup> To see this, we first implanted three E-AB sensors in a  
273 single rat: one in a jugular vein, a second in a leg muscle, and a third in the bladder (**Fig. 6a**). Upon  
274 intravenous challenge with 40 mg/kg kanamycin, we again observed a rapid increase in plasma  
275 drug level peaking at  $\sim 200$   $\mu\text{M}$ . As expected, the sensors placed in the tissue and bladder also  
276 measured rising drug levels, albeit with a delay arising due to the slow transport of the drug into  
277 the tissues and the slow excretion of the drug via the kidneys (**Fig. 6b**). Following on this, we also  
278 implanted a sensor against the chemotherapeutic doxorubicin into a solid tumor (**Fig. 6c**,  
279 Supplementary materials, **video 1**). Once again, when we implanted a doxorubicin-detecting gel-  
280 protected sensor in BALB/C nude mice, we achieve a micromolar precision upon intravenous  
281 challenge with the drug (**Fig. 6d**) at therapeutically relevant concentrations.

282

283

284

285

286

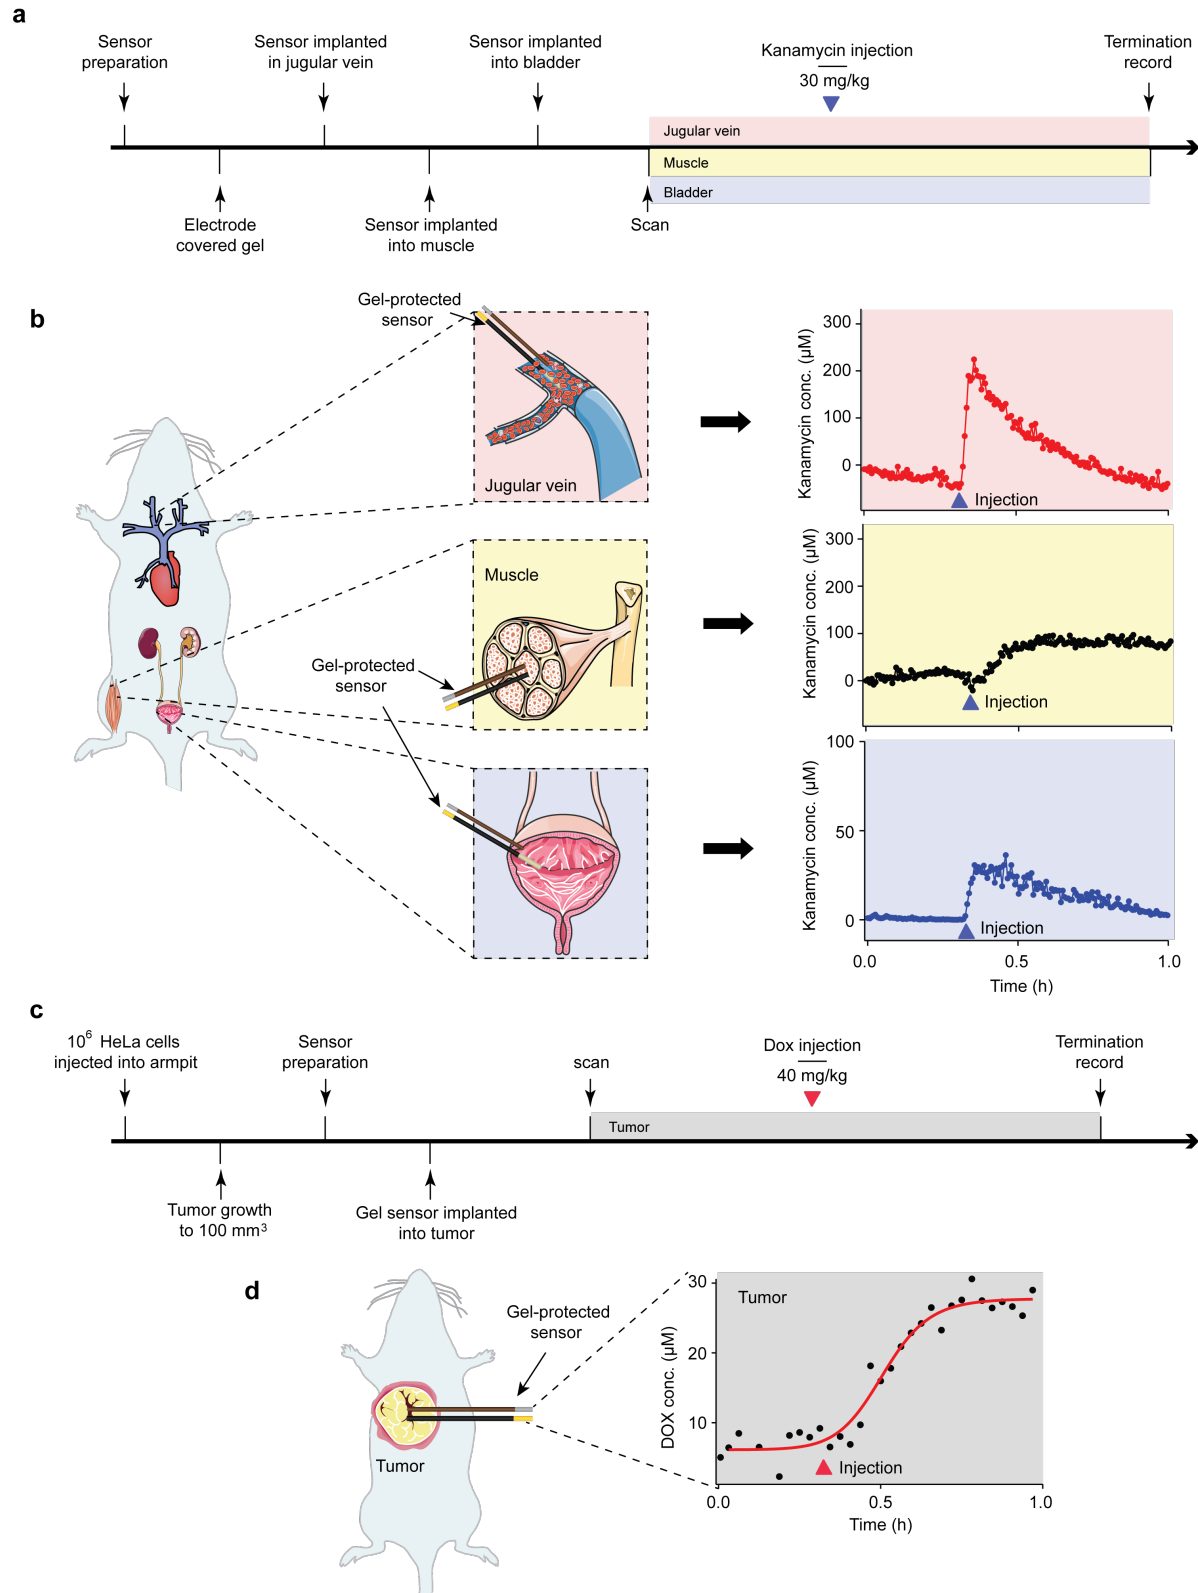

287

288 **Fig. 6** Gel-protected E-AB sensors exhibit good baseline stability when placed in a variety of bodily

289 compartments. (a) To show this we simultaneously implanted kanamycin-detecting sensors in the jugular



290 vein, leg muscle, and bladder of a single rat. (b) Upon intravenous challenge with 40 mg/kg kanamycin we  
291 once again observed an immediate rise of drug in the vein, peaking at  $\sim 200 \mu\text{M}$ . The sensors in the muscle  
292 and bladder exhibited slower drug level rise, indicating a slower uptake into the solid tissues and slower  
293 elimination of the drug from the blood. (c) We have also explored the use of E-AB sensors to perform  
294 continuous, real-time molecular tracking in situ in a tumor. (d) Specifically, a gel-protected, doxorubicin-  
295 detecting sensor placed inside of a xenograph tumor achieved micromolar precision upon an intravenous  
296 challenge of the drug at 40 mg/kg, a dose that is therapeutically relevant.

297

## 298 **Biocompatibility**

299

300 We also performed preliminary exploration of the biocompatibility of both unprotected and gel-  
301 protected E-AB sensors, a critical issue for the development of long-duration implantable  
302 devices.<sup>[7, 34-37]</sup> To do so we employed five groups of rats (15 rats per group): those implanted with  
303 (1) gel-protected and (2) unprotected sensors in the tail vein; those implanted with (3) gel-protected  
304 and (4) unprotected sensors in the muscle of the left hind limb; and (5) a control group that was  
305 not implanted with any sensors, but was subjected to the same surgical procedures as a combination  
306 of both vein and muscle groups. In each case, the sensors remained in the animal for one week.  
307 During this time observed no significant difference among the five groups in terms of body weight,  
308 food/water consumption, or behavior (**Fig. 7a-c**). A week post-implantation we performed blood  
309 examination and morphology studies. Upon visual inspection, we observed what appeared to be  
310 complete recovery of the implantation site and no inflammation of the skin (Supplementary Figs.  
311 12-17). Consistent with this, we did not observe any significant differences in blood vessel  
312 morphology, and only slight differences in muscle tissue between implanted sensors (either  
313 protected or unprotected) and controls (**Fig. 7d**). Likewise, we did not detect any hematological  
314 changes in terms of white blood cells, red blood cells, hemoglobin, and platelets counts (**Fig. 7f**).  
315 To test for the presence of thrombosis in intravenous placements,<sup>[38]</sup> we collected the vessels from  
316 the rats one week after tail-vein implantation. In neither case did we observe thrombosis for either  
317 gel-protected or unprotected implantations (**Fig. 7g**, Supplementary Fig. 18). Neither did we detect  
318 any significant differences in endothelin, D-dimer and thrombomodulin between the five groups  
319 (**Fig. 7h**), further suggesting that sensor implantation does not lead to thrombosis. Finally, to  
320 evaluate the immune response provoked by our sensors (which can be an obstacle to practical  
321 implantable devices<sup>[39-40]</sup>), we monitored the inflammatory biomarkers C-reactive protein, tumor

322 necrosis factor  $\alpha$ , interleukin 12 and interleukin 6, observing no statistical difference ( $p > 0.05$ )  
323 between any of the five groups (**Fig. 7i**).

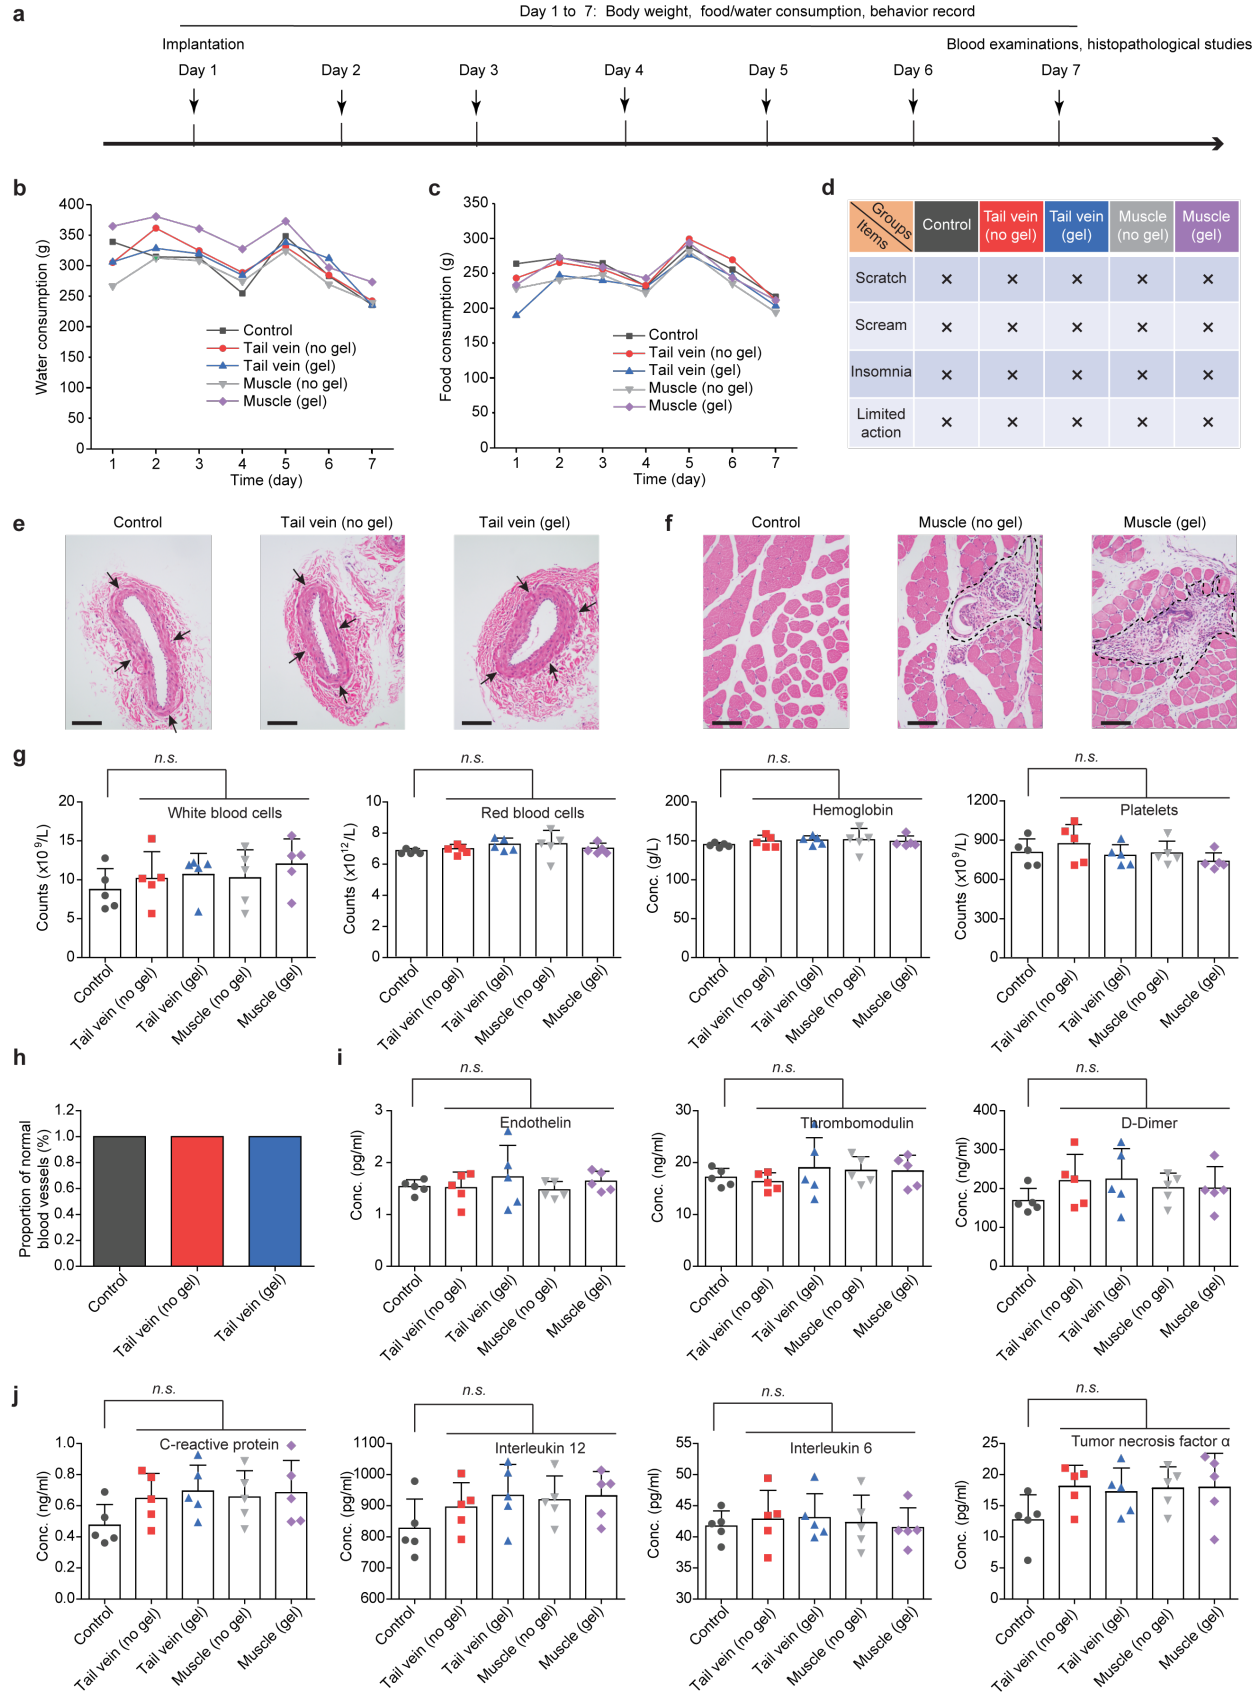

325 **Fig. 7** Both gel-protected and unprotected sensors exhibit good biocompatibility. To determine this we  
326 employed five groups of 15 rats each: (1) gel-protected and (2) unprotected sensors (denoted here as “no  
327 gel”) implanted in the tail vein; (3) gel-protected and (4) unprotected sensors implanted in the muscle of  
328 the left hind limb; and (5) a control group that was not implanted with any sensors, but was subjected to the  
329 same surgical procedures (both vein and muscle) as the former groups (Supplementary Figs.12-17). (We  
330 observed no significant differences in (a) water consumption, (b) food consumption or (c) animal behavior  
331 between implanted and control animals. (d) Likewise, we observed no significant difference in the  
332 morphology of the tail vein after one-week implantations. Here, the black arrows denote the tail vein. (e)  
333 Implantations of both protected and unprotected in the muscle cause mild inflammation, as indicated by  
334 black dotted lines. (f) We observe no significant differences in blood counts between any of these five  
335 groups. Likewise, we observed (g) no thrombosis, and (h) no significant change in the coagulation markers  
336 endothelin, D-dimer, or thrombomodulin. (i) Finally, we observed no significant differences in the plasma  
337 levels of the inflammatory factors C-reactive protein, interleukin 12, interleukin 6 and tumor necrosis factor  
338  $\alpha$ .

339

## 340 **Conclusions**

341 Here we demonstrate that the application of an argarose hydrogel coating significantly reduces  
342 drift when E-AB sensors are deployed both in vitro in undiluted whole blood and in situ in the  
343 veins, the bladder, solid healthy tissue, or solid neoplastic tissues of live rats. We believe this  
344 improved stability is due to the dependent differential kinetics of molecule diffusion across the gel,  
345 which allows low-molecular weight target molecules to diffuse rapidly to the sensor surface while  
346 largely blocking the approach of high-molecular weight components, minimizing non-specific  
347 adsorption to the sensor and enzymatic degradation of its aptamer. Moreover, gel-protected sensors  
348 achieve these improvements without significant reductions in time resolution, limits of detection,  
349 precision, or accuracy. Finally, we have demonstrated that gel-protected sensors retain the same  
350 biocompatibility as unprotected E-AB sensors when implanted in blood vessels or muscle tissue,  
351 as neither causes any detectable impact on animal behavior or blood properties, and only minimal  
352 changes in tissue morphology.

353

## 354 **Acknowledgements**

355 This work was supported by the National Natural Science Foundation of China (21525523,  
356 21804121, 21874121, 21801231), the Fundamental Research Funds (CUG170665, CUG170668)

357 for the Central Universities, China University of Geosciences (Wuhan) and the US National  
358 Institutes of Health (EB022015).

359

### 360 **Author contributions**

361 Dr. S. L. and Dr. H. L. conceived of the project. Dr. S. L., Dr. H. L., Dr. K.W. P., Dr. J. D., Dr. X.  
362 L. and Dr. F. X. designed the experiments. M. Z., H. L fabricated the sensors and tested the sensors,  
363 conducted the HPLC measurements. Dr. S. L., Dr. J. D., Dr. H. L., Q. W. and Dr. N. A.-C. directed  
364 the animal studies, performed the controller simulations and analyzed the data. Dr. H. L., Dr. K.W.  
365 P., Dr. S. L. and Dr. J. D. wrote and edited the manuscript. All authors discussed the results and  
366 commented on the manuscript.

367

### 368 **Additional information**

369 Supplementary information is available for this paper.

370

### 371 **Reference**

- 372 1. Undevia, S. D., Gomez-Abuin, G. & Ratain, M.J. Pharmacokinetic variability of anticancer  
373 agents. *Nat. Rev. Cancer* **5**, 447-458 (2005).
- 374 2. Kanto, J. & Gepts, E. Pharmacokinetic implications for the clinical use of propofol. *Clin.*  
375 *Pharmacokinet.* **17**, 308-326 (1989).
- 376 3. Muller, P. Y. & Milton, M. N. The determination and interpretation of the therapeutic index in  
377 drug development. *Nat. Rev. Drug Discov.* **11**, 751-761 (2012).
- 378 4. Hamburg, M. A. & Collins, F. S. The path to personalized medicine. *New Engl. J. Med.* **363**,  
379 301-304 (2010).
- 380 5. Mage, P. L. et al. Closed-loop control of circulating drug levels in live animals. *Nat. Biomed.*  
381 *Eng.* **1**, 0070 (2017).
- 382 6. Arroyo-currás, N. et al. Real-time measurement of small molecules directly in awake,  
383 ambulatory animals. *Proc. Natl. Acad. Sci. U. S. A.* **114**, 645-650 (2017).
- 384 7. Xie, X. et al. Reduction of measurement noise in a continuous glucose monitor by coating the  
385 sensor with a zwitterionic polymer. *Nat. Biomed. Eng.* **2**, 894-906 (2018).

- 386 8. Hovorka, R. Continuous glucose monitoring and closed-loop systems. *Diabet. Med.* **23**, 1-12  
387 (2006).
- 388 9. Baker, D. A. & Gough, D. A. A Continuous, implantable lactate sensor. *Anal. Chem.* **67**, 1536-  
389 1540 (1995).
- 390 10. Khan, Y. et al. A flexible organic reflectance oximeter array. *PNAS.* **115**, 11015-11024 (2018).
- 391 11. Liu, X. et al. Ultrathin cell-membrane-mimic phosphorylcholine polymer film coating enables  
392 large improvements for In vivo electrochemical detection. *Angew. Chem. Int. Edit.* **56**, 11802-  
393 11806 (2017).
- 394 12. Li, H., Arroyo-currás, N., Kang, D., Ricci, F. & Plaxco, K. W. Dual-reporter drift correction to  
395 enhance the performance of electrochemical aptamer-based sensors in whole blood. *J. Am.*  
396 *Chem. Soc.* **138**, 15809-15812 (2016).
- 397 13. Cash, K. J., Ricci, F. & Plaxco, K. W. An electrochemical sensor for the detection of protein-  
398 small molecule Interactions directly in serum and other complex matrices. *J. Am. Chem. Soc.*  
399 **131**, 6955-6957 (2009).
- 400 14. Li, H., Dauphin-Ducharme, P., Ortega, G. & Plaxco, K. W. Calibration-free electrochemical  
401 biosensors supporting accurate molecular measurements directly in undiluted whole blood. *J.*  
402 *Am. Chem. Soc.* **139**, 11207-11213 (2017).
- 403 15. Hou, H. et al. A generalizable and noncovalent strategy of interfacing aptamers with  
404 microelectrode for selective sensing of neurotransmitter In vivo. *Angew. Chem. Int. Ed.* **59**,  
405 18996-19000 (2020).
- 406 16. Chan, D. et al. Combinatorial polyacrylamide hydrogels for preventing biofouling on  
407 implantable biosensors. *bioRxiv*. <https://doi.org/10.1101/2020.05.25.115675> (2020).
- 408 17. Nakatsuka, N. et al. Aptamer-field-effect transistors overcome Debye length limitations for  
409 small-molecule sensing. *Science.* **362**, 319-324 (2018).
- 410 18. Li, H. et al. A biomimetic phosphatidylcholine-terminated monolayer greatly improves the in  
411 vivo performance of electrochemical aptamer-based sensors. *Angew. Chem. Int. Ed.* **56**, 7492-  
412 7495 (2017).
- 413 19. Vallee-Belisle, A., Ricci, F., Uzawa, T., Xia, F. & Plaxco, K. W. Bioelectrochemical switches  
414 for the quantitative detection of antibodies directly in whole blood. *J. Am. Chem. Soc.* **134**,

- 415 15197-15200 (2012).
- 416 20. Idili, A. et al. Seconds-resolved pharmacokinetic measurements of the chemotherapeutic  
417 irinotecan in situ in the living body. *Chem. Sci.* **10**, 8164-8170 (2019).
- 418 21. Dauphin-Ducharme, P. et al. Electrochemical aptamer-based sensors for improved therapeutic  
419 drug monitoring and high-precision, feedback-controlled drug delivery. *ACS Sensors* **4**, 2832-  
420 2837 (2019).
- 421 22. Li, H. et al. High frequency, calibration-free molecular measurements in situ in the living body.  
422 *Chem. Sci.* **10**, 10843-10848 (2019).
- 423 23. Ferguson, B. S. et al. Real-time, aptamer-based tracking of circulating therapeutic agents in  
424 living animals. *Sci. Transl. Med.* **5**, 213ra165 (2013).
- 425 24. Arroyo-currás, N. et al. Subsecond-resolved molecular measurements in the living body using  
426 chronoamperometrically interrogated aptamer-based sensors. *ACS Sensors* **3**, 360-366 (2018).
- 427 25. Liang, S. et al. Protein diffusion in agarose hydrogel in situ measured by improved refractive  
428 index method. *J. Control. Release* **115**, 189-196 (2006).
- 429 26. Maciel, C. et al. Evans blue as a simple method to discriminate mosquitoes' feeding choice on  
430 small laboratory animals. *PLOS ONE* **9**, 110551-110562 (2014).
- 431 27. Liu, P., Zhu, Z., Zeng, C. & Nie, G. Specific absorption spectra of hemoglobin at different PO<sub>2</sub>  
432 levels: potential noninvasive method to detect PO<sub>2</sub> in tissues. *J. Biomed. Opt.* **17**, 125002-  
433 125008 (2012).
- 434 28. Vieira, P.A. et al. Ultra-high-precision, in-vivo pharmacokinetic measurements highlight the  
435 need for and a route toward more highly personalized medicine. *Front Mol Biosci* **6**, 69 (2019).
- 436 29. Centers for Disease Control and Prevention (CDC) Treatment of tuberculosis. *MMWR Morb*  
437 *Mortal Wkly Rep* 52(RR-11):27-28 (2003).
- 438 30. Klonoff, D. C. Point-of-care blood glucose meter accuracy in the hospital setting. *Diabetes*  
439 *Spectr.* **27**, 174-179 (2014).
- 440 31. [https://www.dexcom.com/getstartedcgm?utm\\_source=adwords&utm\\_campaign=b&sfc=7013](https://www.dexcom.com/getstartedcgm?utm_source=adwords&utm_campaign=b&sfc=70133000001LlpgAAC&gclid=CO3fwIK419MCFRSDfgod2nwEiw)  
441 [3000001LlpgAAC&gclid=CO3fwIK419MCFRSDfgod2nwEiw](https://www.dexcom.com/getstartedcgm?utm_source=adwords&utm_campaign=b&sfc=70133000001LlpgAAC&gclid=CO3fwIK419MCFRSDfgod2nwEiw).
- 442 32. Gao, X. et al. Dietary methionine influences therapy in mouse cancer models and alters human  
443 metabolism. *Nature* **572**, 397-401 (2019).

- 444 33. Dodd, D. et al. A gut bacterial pathway metabolizes aromatic amino acids into nine circulating  
445 metabolites. *Nature* **551**, 648-652 (2017).
- 446 34. Sun, K. H. et al. Evaluation of in vitro and in vivo biocompatibility of a myo-inositol  
447 hexakisphosphate gelated polyaniline hydrogel in a rat model. *Sci. Rep.* **6**, 23931 (2016).
- 448 35. Edlund, U., Albertsson, A. C., Singh, S. K., Fogelberg, I. & Lundgren, B. O. Sterilization,  
449 storage stability and in vivo biocompatibility of poly(trimethylene carbonate)/poly(adipic  
450 anhydride) blends. *Biomaterials* **21**, 945-955 (2000).
- 451 36. Junge, K. et al. Mesh biocompatibility: effects of cellular inflammation and tissue remodelling.  
452 *Langenbecks Arch. Surg.* **397**, 255-270 (2012).
- 453 37. Saltzman, W. M. in *Biomedical Engineering: bridging medicine and technology* (eds Saltzman,  
454 W. M.) 627 (The United States of America by Cambridge University Press, New York, 2009).
- 455 38. Wang, D. et al. Expanded poly(tetrafluoroethylene) blood vessel grafts with embedded reactive  
456 oxygen species (ROS)-responsive antithrombogenic drug for elimination of thrombosis. *ACS*  
457 *Appl. Mater. Interfaces* **12**, 29844-29853 (2020).
- 458 39. Veiseh, O. et al. Size-and shape-dependent foreign body immune response to materials  
459 implanted in rodents and non-human primates. *Nat. Mater.* **14**, 643-651 (2015).
- 460 40. Choi, C., Lee, Y., Cho, K. W., Koo, J. H. & Kim, D. H. Wearable and implantable soft  
461 bioelectronics using two-dimensional materials. *Accounts Chem. Res.* **52**, 73-81 (2019).
